# Supplementary material for: Comparative Study of Starch Phosphorylase Genes and Encoded Proteins in Various Monocots and Dicots with Emphasis on Maize
Source: MDPI journal article supplement (doi:10.3390/ijms23094518), 2022-04-20
Supplement: s1 [file s1]

# Supplementary Material

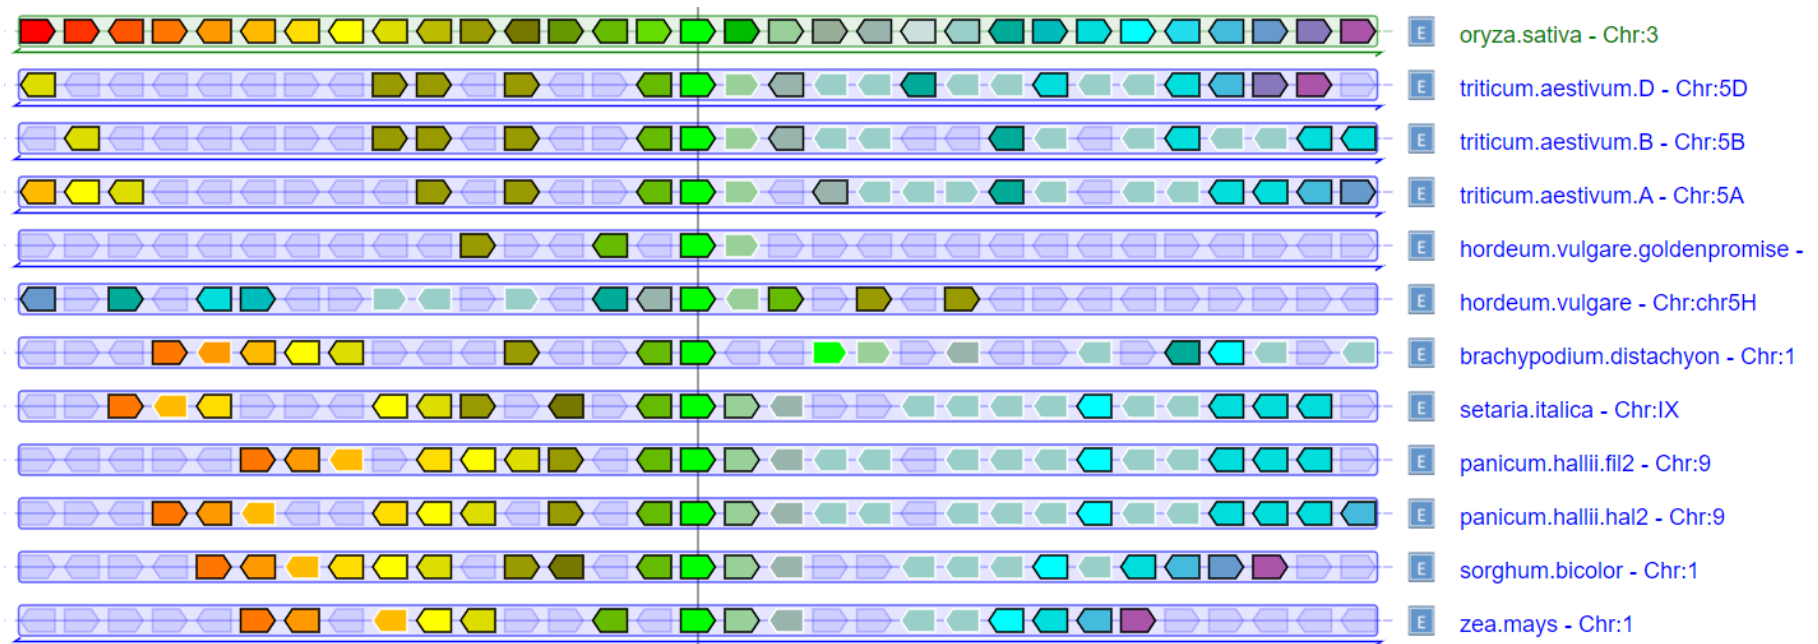

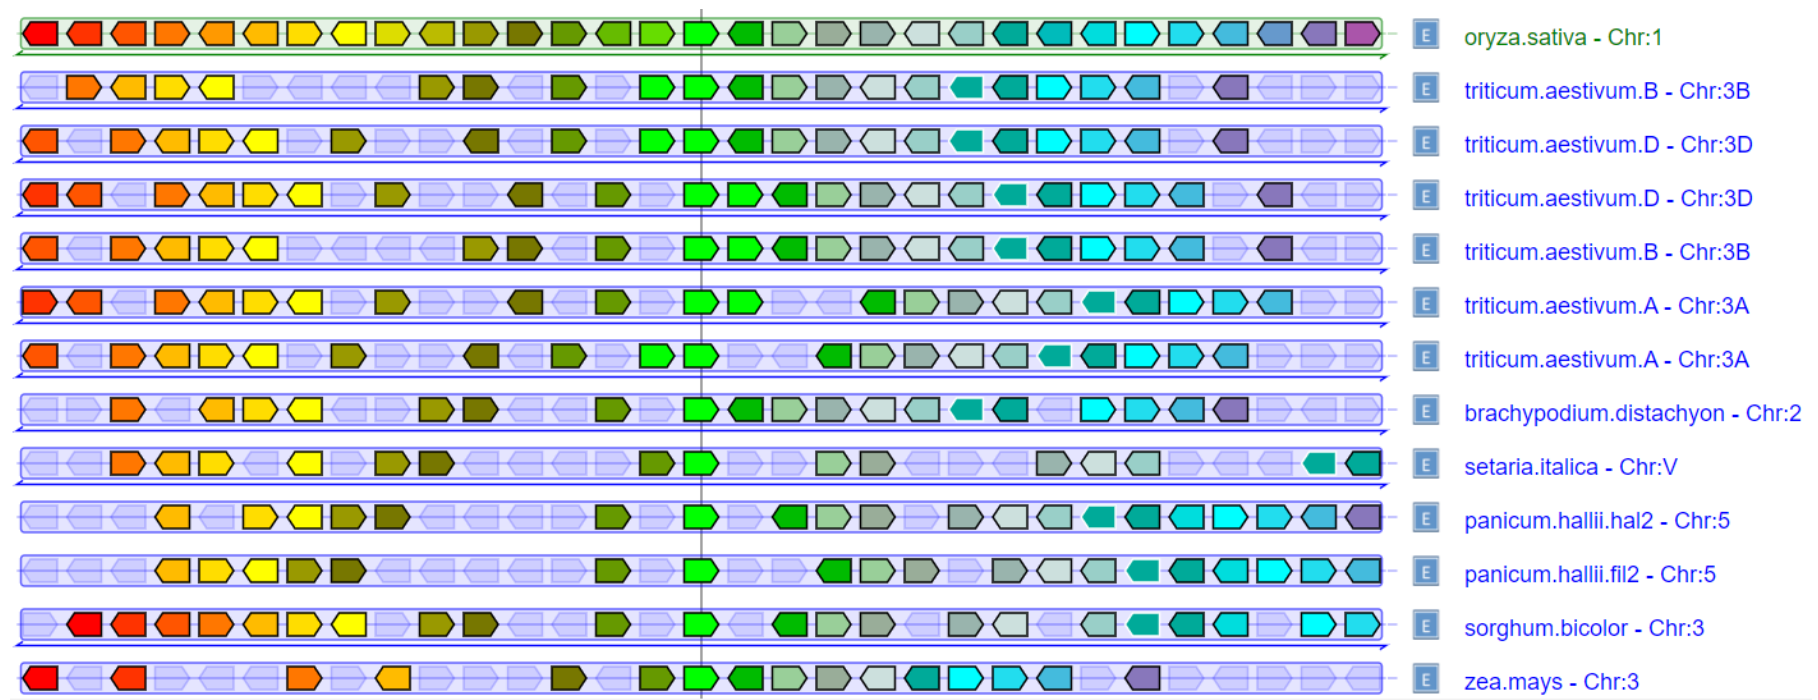

**Figure S2.** Synteny conservation of PHO2.

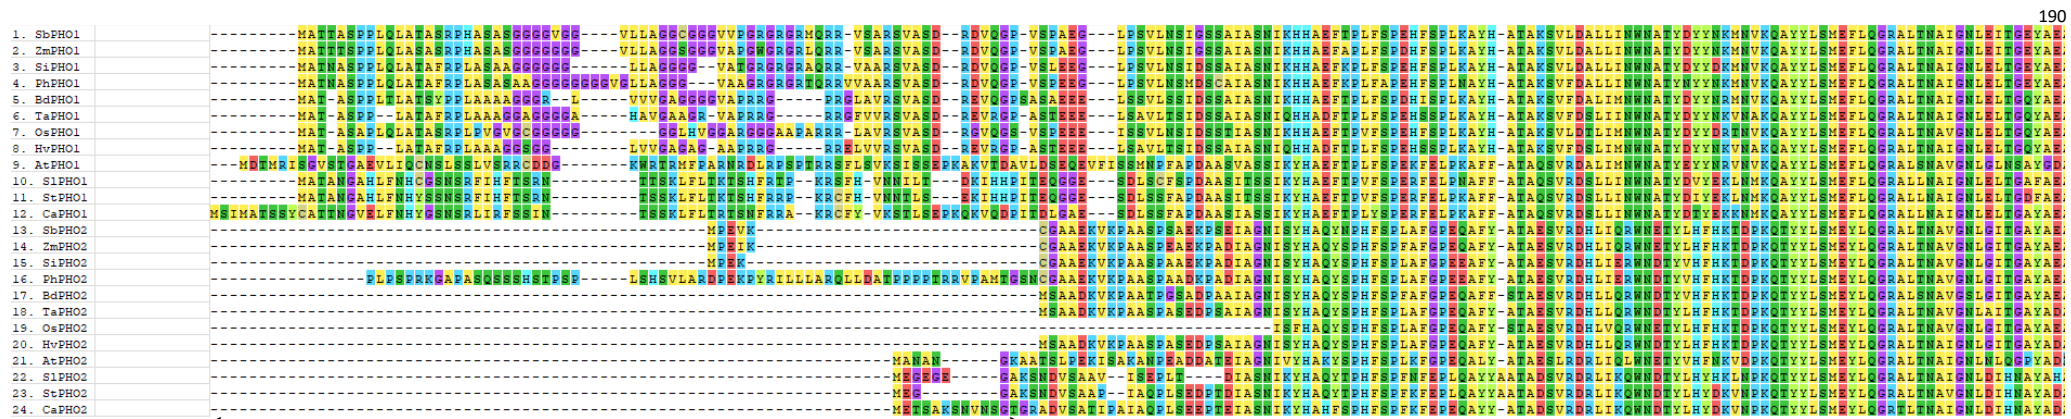

Transit Peptide

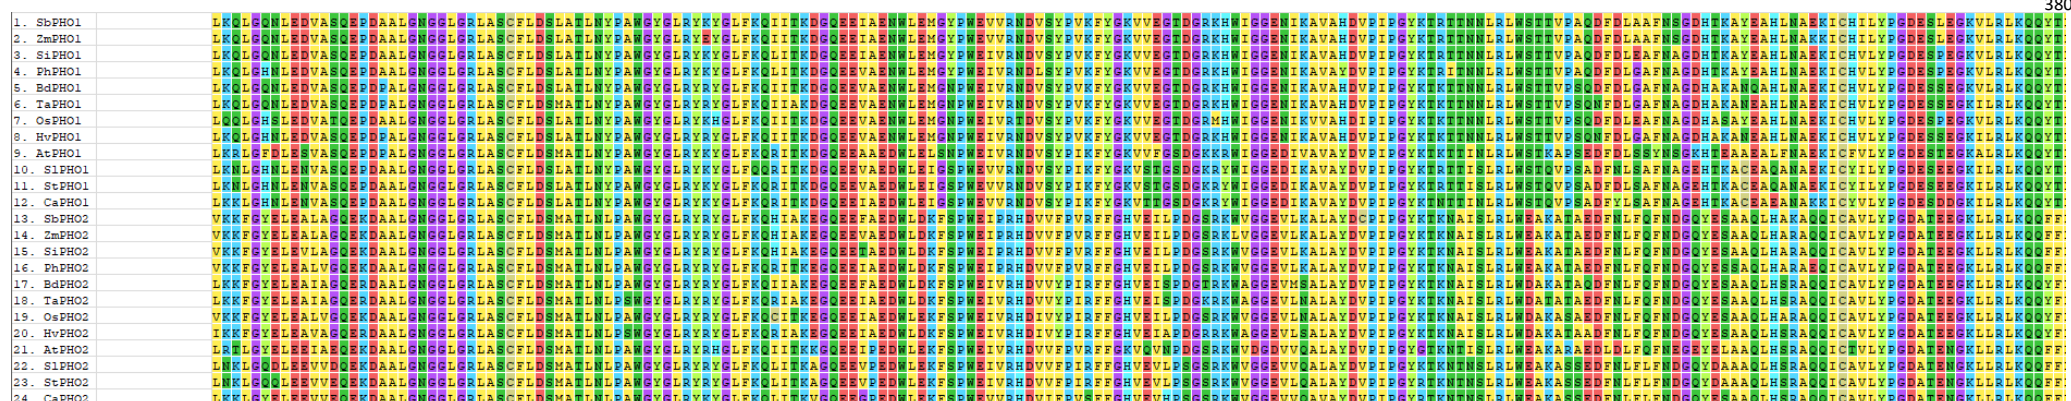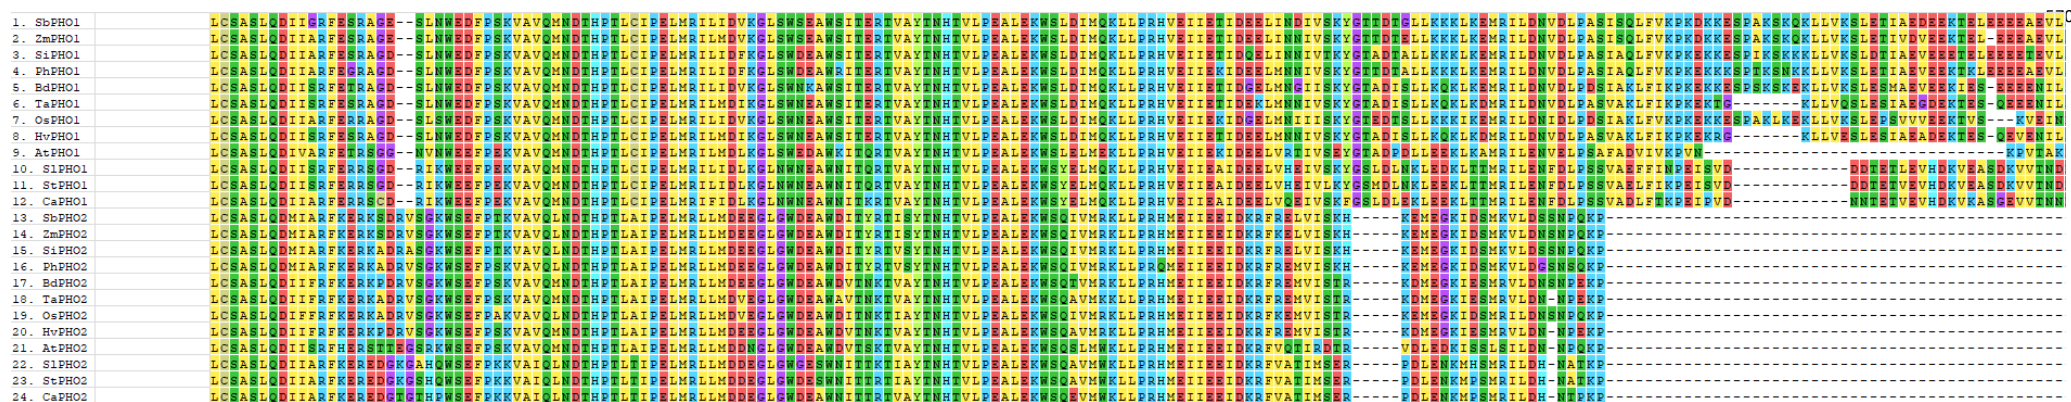

L80 Insertion



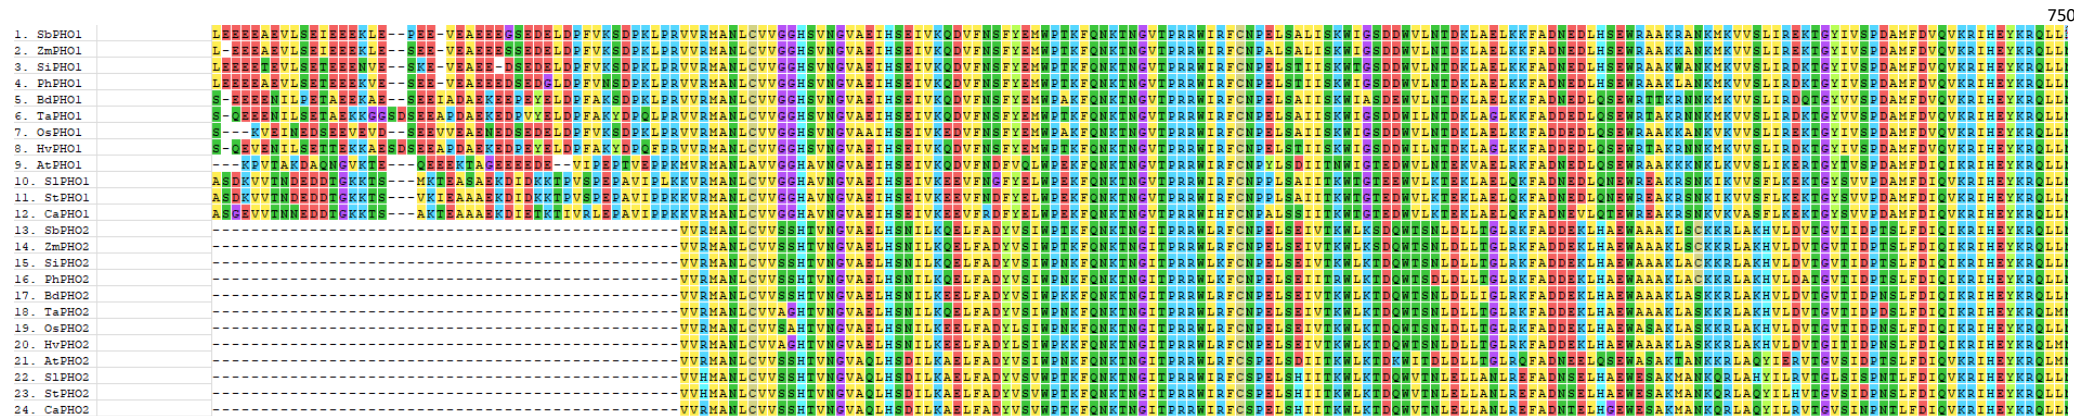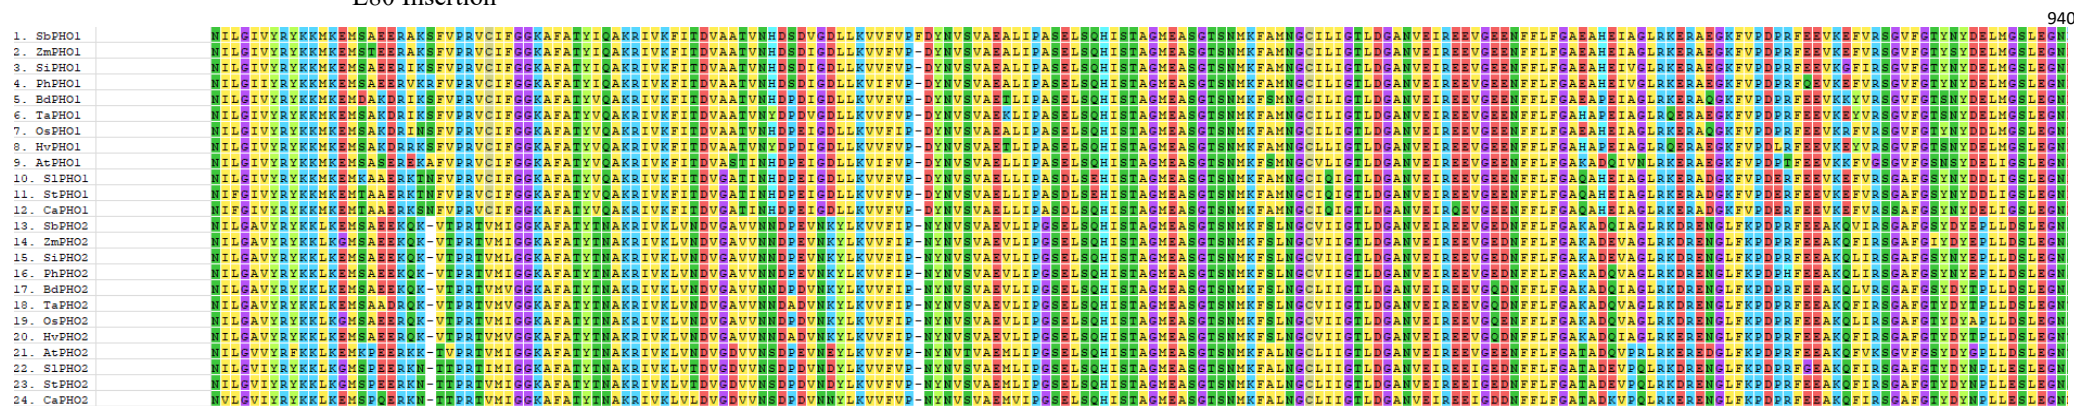

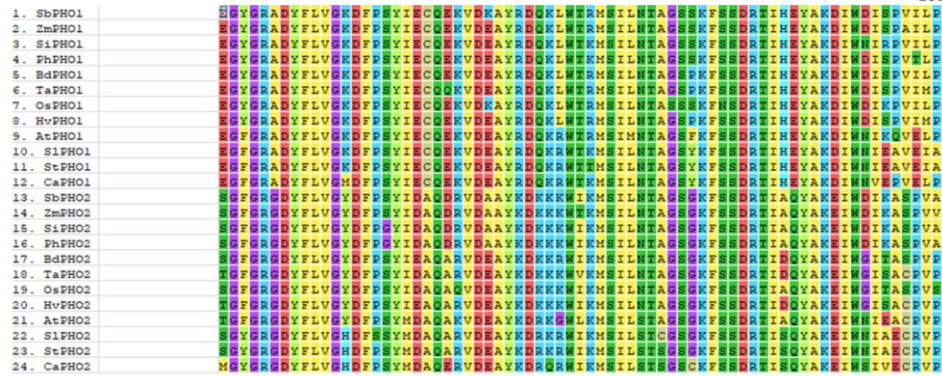

**Figure S3.** Multiple alignment of PHO sequences in range of species. The sequences of PHO1 include the transit peptide and L80 insertion. Full alignment parts is shown.

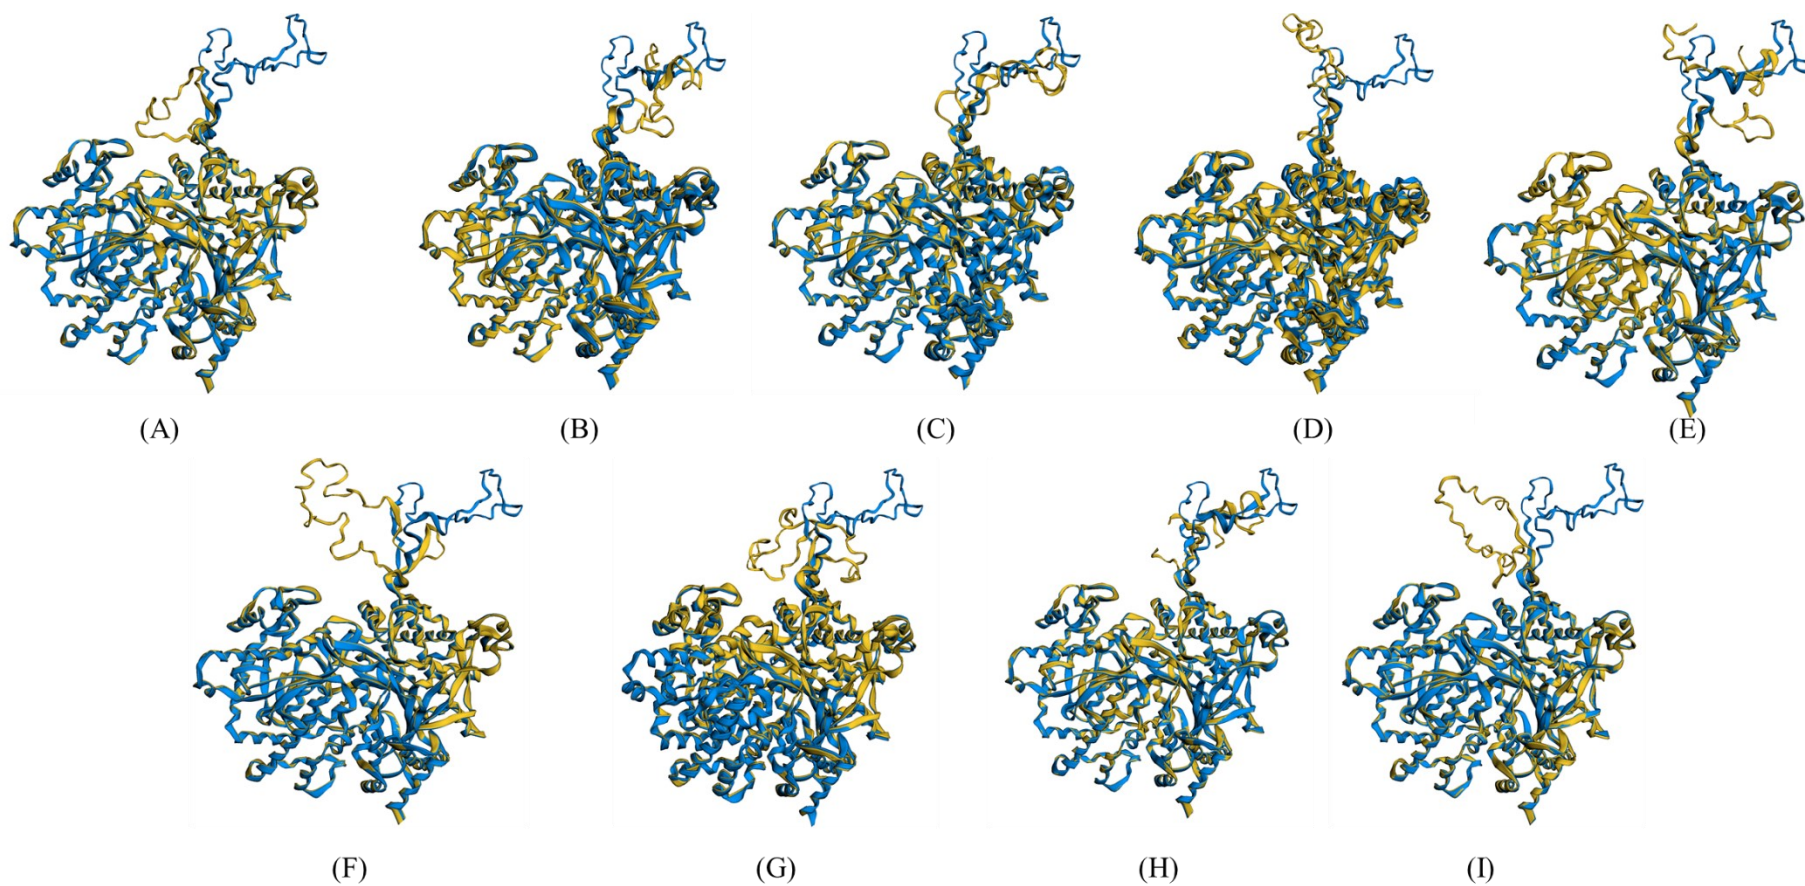

**Figure S4.** Superimposed structures of the predicted PHO1 (yellow colored) over the *H. vulgare* PHO1 (blue colored) in range of species. (A) AtPHO1. (B) SbPHO1. (C) CaPHO1. (D) OsPHO1. (E) PhPHO1. (F) SiPHO1. (G) SlPHO1. (H) StPHO1. (I) TaPHO1.



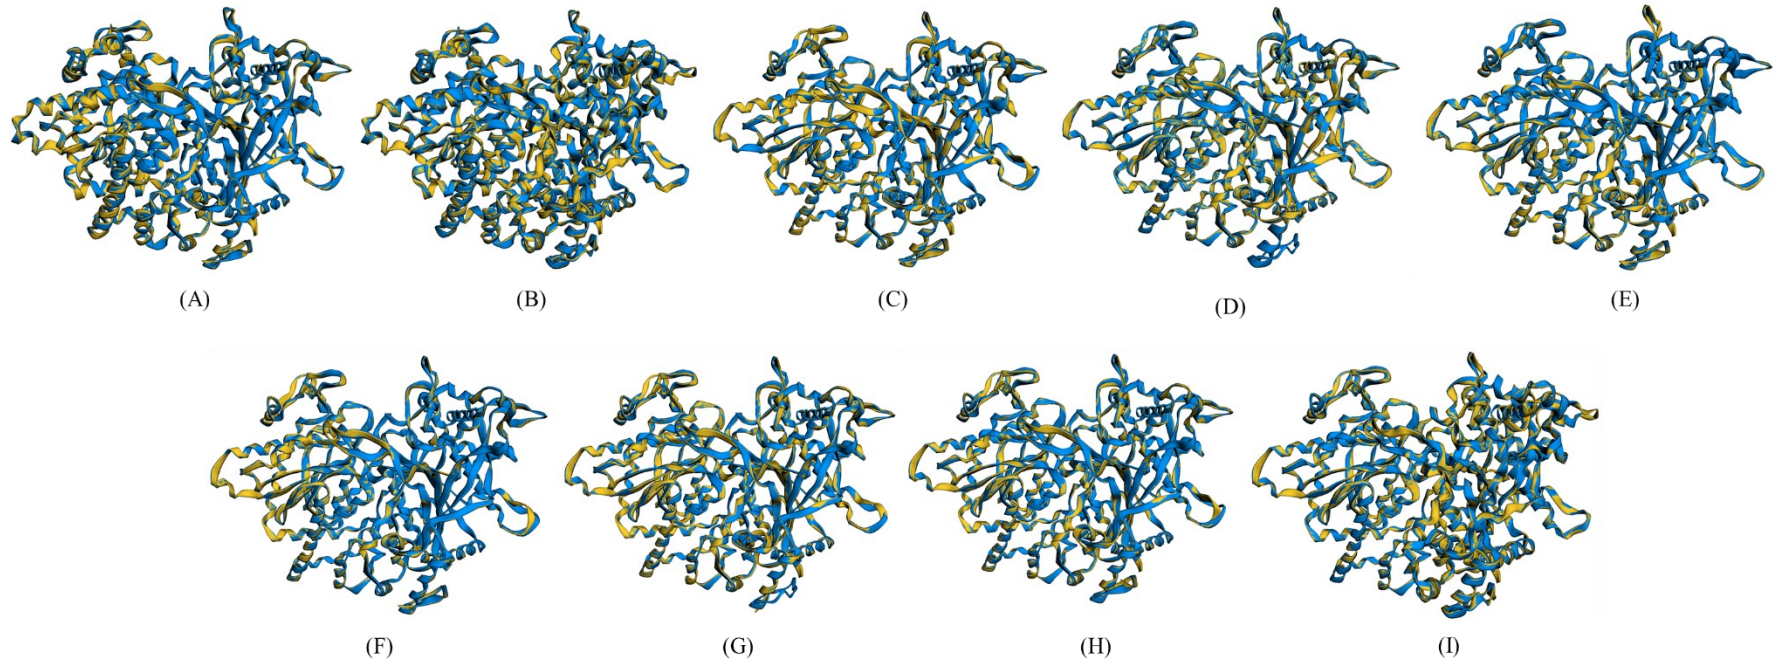

**Figure S5.** Superimposed structures of the predicted PHO2 (yellow colored) over the *A. thaliana* PHO2 (blue colored) in range of species. (A) AtPHO2. (B) SbPHO2. (C) CaPHO2. (D) OsPHO2. (E) PhPHO2. (F) SiPHO2. (G) SlPHO2. (H) StPHO2. (I) TaPHO2.

**Table S1.** Percent similarity of exons (upper row) and introns (lower row) of *PHO1* in different species with respect to exons of *PHO1* of *O. sativa*.

| Species              | Exon/Intron number |      |      |      |      |      |      |      |      |      |      |      |      |      |      |
|----------------------|--------------------|------|------|------|------|------|------|------|------|------|------|------|------|------|------|
|                      | 1                  | 2    | 3    | 4    | 5    | 6    | 7    | 8    | 9    | 10   | 11   | 12   | 13   | 14   | 15   |
| <i>Z. mays</i>       | 52.2               | 85.0 | 80.4 | 86.2 | 89.1 | 90.1 | 89.0 | 78.3 | 85.0 | 89.1 | 89.0 | 92.2 | 93.0 | 87.1 | 56.9 |
|                      | 39.6               | 62.6 | 47.8 | 60.0 | 36.1 | 56.3 | 65.2 | 51.8 | 52.2 | 23.8 | 9.7  | 36.6 | 52.5 | 32.7 | -    |
| <i>S. italica</i>    | 67.5               | 86.7 | 86.3 | 85.4 | 90.9 | 88.6 | 89.0 | 79.1 | 85.0 | 86.8 | 90.7 | 90.9 | 90.9 | 88.6 | 59.3 |
|                      | 39.3               | 41.7 | 40.3 | 40.0 | 44.4 | 42.8 | 41.7 | 38.5 | 39.7 | 22.9 | 39.8 | 30.0 | 34.3 | 44.6 | -    |
| <i>P. hallii</i>     | 67.3               | 85.4 | 86.3 | 86.0 | 88.8 | 89.3 | 90.7 | 78.3 | 86.3 | 83.7 | 90.3 | 92.2 | 91.4 | 89.1 | 59.2 |
|                      | 41.1               | 38.1 | 40.2 | 37.2 | 44.4 | 44.9 | 33.7 | 42.1 | 40.1 | 22.8 | 38.0 | 37.6 | 49.6 | 41.9 | -    |
| <i>B. distachyon</i> | 65.8               | 88.4 | 85.3 | 88.2 | 88.4 | 89.3 | 90.7 | 80.3 | 90.2 | 86.0 | 90.3 | 93.5 | 92.5 | 89.6 | 61.2 |

|                                    |      |      |      |      |      |      |      |      |      |      |      |      |      |      |      |
|------------------------------------|------|------|------|------|------|------|------|------|------|------|------|------|------|------|------|
|                                    | 43.0 | 33.6 | 43.9 | 32.9 | 40.5 | 34.9 | 34.3 | 40.0 | 37.4 | 41.8 | 44.8 | 44.9 | 33.6 | 37.6 | -    |
| <i>H. vulgare</i>                  | 64.2 | 86.4 | 83.2 | 86.6 | 87.4 | 88.4 | 90.1 | 79.2 | 89.7 | 85.2 | 89.1 | 92.9 | 91.5 | 89.2 | 60.5 |
|                                    | 42.3 | 32.5 | 41.4 | 31.6 | 39.4 | 33.8 | 33.2 | 40.2 | 38.3 | 40.5 | 44.4 | 43.3 | 32.5 | 36.3 | -    |
| <i>T. aestivum</i>                 | 63.2 | 85.4 | 83.5 | 85.7 | 86.3 | 89.0 | 90.2 | 78.4 | 88.9 | 85.6 | 88.2 | 90.2 | 89.4 | 88.6 | 58.2 |
|                                    | 41.3 | 33.5 | 40.3 | 32.3 | 39.6 | 34.2 | 33.5 | 39.2 | 39.5 | 40.1 | 42.5 | 42.7 | 32.8 | 35.9 | -    |
| <i>S. bicolor</i>                  | 60.8 | 85.8 | 84.3 | 86.0 | 87.7 | 89.3 | 90.7 | 78.4 | 85.6 | 87.6 | 89.9 | 92.2 | 92.5 | 89.1 | 61.9 |
|                                    | 41.0 | 38.8 | 41.9 | 39.3 | 31.8 | 43.9 | 42.0 | 42.7 | 38.1 | 25.0 | 34.3 | 35.5 | 43.5 | 42.0 | -    |
| <i>A. thaliana</i>                 | 45.4 | 66.7 | 57.8 | 76.3 | 71.4 | 74.6 | 80.5 | 52.4 | 73.9 | 77.5 | 79.8 | 77.9 | 77.5 | 72.6 | 45.3 |
|                                    | 7.3  | 29.5 | 28.0 | 42.7 | 31.5 | 42.6 | 44.0 | 43.8 | 31.6 | 34.8 | 24.8 | 28.9 | 35.3 | 10.9 | -    |
| <i>S. lycopersi-</i><br><i>cum</i> | 37.5 | 65.4 | 67.6 | 79.9 | 71.0 | 79.0 | 77.1 | 56.9 | 74.5 | 71.3 | 78.9 | 75.3 | 82.9 | 79.1 | 46.2 |
|                                    | 41.1 | 27.7 | 37.6 | 32.2 | 25.1 | 42.0 | 43.6 | 48.2 | 11.8 | 35.5 | 35.4 | 8.3  | 37.9 | 12.5 | -    |
| <i>S. tuberosum</i>                | 34.9 | 32.1 | 14.8 | 44.6 | 29.9 | 43.8 | 32.2 | X    | X    | X    | X    | X    | X    | X    | X    |
|                                    | 16.9 | 41.2 | 20.3 | 9.3  | 16.1 | 35.6 | -    | -    | -    | -    | -    | -    | -    | -    | -    |
| <i>C. annuum</i>                   | 33.7 | 65.7 | 69.6 | 79.2 | 69.6 | 78.3 | 77.1 | 56.1 | 71.9 | 71.3 | 79.7 | 81.8 | 82.4 | 56.8 | 47.5 |
|                                    | 43.0 | 31.1 | 38.1 | 36.0 | 29.7 | 30.7 | 45.3 | 50.8 | 13.7 | 35.8 | 34.3 | 20.7 | 43.4 | 16.0 | -    |

x indicates absence of exons, - indicates absence of introns

**Table S2.** Percent similarity of exons (upper row) and introns (lower row) of *PHO2* in different species with respect to exons of *PHO2* in *O. sativa*.

| Species              | Exon/Intron number |      |      |      |      |      |      |      |      |      |      |      |      |      |      |
|----------------------|--------------------|------|------|------|------|------|------|------|------|------|------|------|------|------|------|
|                      | 1                  | 2    | 3    | 4    | 5    | 6    | 7    | 8    | 9    | 10   | 11   | 12   | 13   | 14   | 15   |
| <i>Z. mays</i>       | 66.8               | 96.1 | 88.7 | 82.6 | 90.0 | 92.5 | 87.0 | 89.0 | 82.6 | 87.2 | 90.2 | 85.5 | 86.7 | 90.6 | 52.0 |
|                      | 46.0               | 13.5 | 42.0 | 45.2 | 27.2 | 4.9  | 42.6 | 36.3 | 41.1 | 41.1 | 35.1 | 36.7 | 31.6 | 44.5 | -    |
| <i>S. italica</i>    | 72.9               | 92.8 | 88.7 | 82.6 | 90.0 | 91.4 | 87.0 | 89.0 | 84.8 | 88.6 | 91.2 | 87.4 | 86.7 | 90.1 | 58.1 |
|                      | 62.5               | 29.4 | 59.1 | 50.6 | 29.5 | 53.7 | 59.9 | 34.9 | 48.9 | 70.1 | 51.0 | 53.1 | 32.5 | 48.8 | -    |
| <i>P. hallii</i>     | 73.1               | 95.6 | 91.0 | 81.4 | 87.4 | 90.3 | 89.7 | 88.1 | 82.6 | 87.7 | 90.2 | 87.4 | 87.9 | 88.5 | 55.2 |
|                      | 45.2               | 29.3 | 40.6 | 43.5 | 21.0 | 43.4 | 46.4 | 35.6 | 41.5 | 41.3 | 39.6 | 43.6 | 34.2 | 19.5 | -    |
| <i>B. distachyon</i> | 66.9               | 92.2 | 86.4 | 87.2 | 88.4 | 91.4 | 88.6 | 89.0 | 89.4 | 90.4 | 92.6 | 87.4 | 90.5 | 89.5 | 62.7 |
|                      | 58.6               | 32.9 | 59.1 | 53.6 | 57.9 | 54.1 | 48.0 | 39.9 | 23.5 | 70.9 | 55.9 | 55.6 | 60.3 | 45.9 | -    |
| <i>H. vulgare</i>    | 65.4               | 91.4 | 86.3 | 88.2 | 87.6 | 90.7 | 87.2 | 88.6 | 88.1 | 89.7 | 91.2 | 86.3 | 89.7 | 89.2 | 61.6 |
|                      | 46.2               | 33.2 | 58.2 | 50.2 | 56.2 | 53.8 | 47.2 | 38.8 | 24.2 | 70.4 | 53.2 | 53.7 | 58.9 | 52.0 | -    |
| <i>T. aestivum</i>   | 62.8               | 90.5 | 87.5 | 81.2 | 89.1 | 89.4 | 85.2 | 82.1 | 80.6 | 86.7 | 90.1 | 84.2 | 86.2 | 89.0 | 52.3 |
|                      | 43.0               | 14.2 | 45.6 | 42.3 | 26.7 | 52.4 | 46.3 | 37.2 | 40.5 | 67.5 | 49.1 | 45.6 | 34.9 | 41.6 | -    |
| <i>S. bicolor</i>    | 73.8               | 96.1 | 88.1 | 80.2 | 87.9 | 92.5 | 88.1 | 91.5 | 84.1 | 87.2 | 89.7 | 86.8 | 85.6 | 91.1 | 53.9 |



|                                    |      |      |      |      |      |      |      |      |      |      |      |      |      |      |      |
|------------------------------------|------|------|------|------|------|------|------|------|------|------|------|------|------|------|------|
|                                    | 53.5 | 29.3 | 56.7 | 47.5 | 29.2 | 52.0 | 56.1 | 34.9 | 47.9 | 67.8 | 48.9 | 49.0 | 34.0 | 42.6 | -    |
| <i>A. thaliana</i>                 | 38.0 | 42.3 | 42.7 | 29.3 | 28.4 | 34.4 | 30.6 | 37.6 | 42.7 | 35.3 | 44.7 | 39.9 | 35.3 | 40.4 | 23.7 |
|                                    | 35.4 | 32.3 | 44.8 | 10.8 | 23.3 | 22.5 | 39.0 | 24.4 | 19.7 | 38.1 | 43.2 | 44.1 | 40.7 | 26.2 | =    |
| <i>S. lycopersi-</i><br><i>cum</i> | 26.8 | 43.2 | 43.8 | 29.0 | 27.3 | 31.6 | 30.6 | 34.0 | 44.1 | 35.1 | 41.9 | 40.8 | 32.5 | 39.2 | 23.7 |
|                                    | 33.5 | 17.7 | 20.4 | 11.3 | 23.3 | 27.7 | 16.8 | 47.8 | 24.0 | 11.7 | 46.8 | 45.4 | 1.8  | 26.4 | =    |
| <i>S. tuberosum</i>                | 16.9 | 40.3 | 46.2 | 29.2 | 27.3 | 32.3 | 33.4 | 36.0 | 43.4 | 34.5 | 42.3 | 40.8 | 34.0 | 39.6 | 23.3 |
|                                    | 38.1 | 31.2 | 5.2  | 11.4 | 24.6 | 28.7 | 6.5  | 43.8 | 23.6 | 10.0 | 42.4 | 45.1 | 3.3  | 25.4 | =    |
| <i>C. annuum</i>                   | 31.1 | 35.4 | 46.1 | 28.8 | 29.7 | 34.6 | 29.6 | 33.5 | 42.7 | 37.9 | 43.9 | 42.7 | 32.2 | 39.3 | 23.8 |
|                                    | 28.8 | 16.8 | 1.0  | 10.8 | 17.3 | 27.9 | 9.6  | 45.2 | 23.4 | 9.7  | 5.8  | 45.8 | 1.0  | 25.9 | =    |

x indicates absence of exons, - indicates absence of introns, = have intron but did not analyze

**Table S3.** Simple sequence repeats (SSRs) and retro-elements identified in *PHO1*.

| Species              | Position in bp | Type           | Repeat     | Size(bp) |
|----------------------|----------------|----------------|------------|----------|
| <i>S. bicolor</i>    | 147-199        | SSR            | (CGC)n     | 50       |
|                      | 1665-1739      | SSR            | (TTCTATT)n | 45       |
| <i>Z. mays</i>       | 183-239        | SSR            | (CGC)n     | 52       |
|                      | 4442-4480      | SSR            | (AAGAGCA)n | 41       |
|                      | 6512-6558      | SSR            | (ATCTT)n   | 48       |
| <i>S. italica</i>    | 8-49           | SSR            | (CATCG)n   | 46       |
|                      | 90-138         | SSR            | (CGC)n     | 45       |
| <i>P.hallii</i>      | 77-136         | SSR            | (CGCCTC)n  | 60       |
|                      | 138-162        | SSR            | (GGGGGC)n  | 25       |
|                      | 2633-2719      | SSR            | (ATGTTT)n  | 89       |
| <i>B. distachyon</i> | 104-163        | SSR            | (CCG)n     | 60       |
| <i>O. sativa</i>     | 26-63          | SSR            | (CT)n      | 38       |
|                      | 150-171        | SSR            | (CGGCGG)n  | 122      |
|                      | 407-436        | SSR            | (CG)n      | 30       |
|                      | 5138-5171      | SSR            | (TCTTCA)n  | 33       |
| <i>A. thaliana</i>   | 2621-2667      | Low-complexity | GA-rich    | 47       |
| <i>C. annuum</i>     | 3128-3197      | SSR            | (TTCTT)n   | 64       |
|                      | 7350-7407      | SSR            | (TTTTCT)n  | 57       |

**Table S4.** Simple sequence repeats (SSRs) and retro-elements identified in *PHO2*.

| Species                | Position in bp | Type           | Repeat    | Size(bp) |
|------------------------|----------------|----------------|-----------|----------|
| <i>S. bicolor</i>      | 5917-5940      | SSR            | (T)n      | 24       |
| <i>S. italica</i>      | 1-33           | SSR            | (TCC)     | 30       |
| <i>P.hallii</i>        | 45-77          | SSR            | (CTCCCA)  | 33       |
| <i>B. distachyon</i>   | 3812-3836      | SSR            | (TTTA)n   | 26       |
| <i>O. sativa</i>       | 31-62          | SSR            | (CCGTT)n  | 32       |
| <i>A. thaliana</i>     | 225-256        | Low-complexity | A-rich    | 31       |
|                        | 849-887        | SSR            | (TG)n     |          |
| <i>S. lycopersicum</i> | 5122-5168      | SSR            | (AATTAC)n | 45       |
|                        | 8035-8068      | SSR            | (TATTCT)n | 34       |
|                        | 11669-11703    | SSR            | (CTATTC)n | 35       |
| <i>S. tuberosum</i>    | 141-169        | SSR            | (TCTTT)n  | 28       |
|                        | 2048-2082      | SSR            | (TTATTT)n | 33       |
|                        | 5826-5846      | SSR            | (TG)n     | 21       |
|                        | 6987-7033      | SSR            | (AATTAC)n | 45       |
| <i>C. annuum</i>       | 3543-3597      | SSR            | (CAA)n    | 54       |
|                        | 1849418541     | Low-complexity | G-rich    | 47       |
|                        | 18620-18670    | SSR            | (ATTCA)n  | 49       |
|                        | 31248-31296    | SSR            | (CAA)n    | 45       |
|                        | 31355-31402    | Low-complexity | A-rich    | 50       |
|                        | 32006-32087    | Low-complexity | GA-rich   | 77       |

**Table S5.** Details of 3D structure and quality assessment parameters of PHO1 (oligostate-homodimer) (upper row) and PHO2 (oligostate-homodimer; lower row) in all of the monocots and dicots obtained using Swiss-Model.

| Species           | Template used | % Identity | GMQE score | Quality assessment parameters |                 |
|-------------------|---------------|------------|------------|-------------------------------|-----------------|
|                   |               |            |            | QMEAN<br>6 score              | Dfire<br>energy |
| <i>S. bicolor</i> | 5lr8.1.A      | 86.98      | 0.78       | 0.88                          | -687.17         |
|                   | 4bqe.1.A      | 79.44      | 0.91       | 0.89                          | -2712.1         |
| <i>Z. mays</i>    | 5lr8.1.A      | 87.51      | 0.79       | 0.89                          | -578.17         |
|                   | 4bqe.1.A      | 79.30      | 0.91       | 0.89                          | -2617.12        |
| <i>S. italica</i> | 5lr8.1.A      | 87.25      | 0.79       | 0.89                          | -581.25         |
|                   | 4bqe.1.A      | 79.18      | 0.91       | 0.89                          | -2812.12        |

|                        |          |       |      |      |          |
|------------------------|----------|-------|------|------|----------|
| <i>P. hallii</i>       | 5lr8.1.A | 87.00 | 0.78 | 0.88 | -612.21  |
|                        | 4bqe.1.A | 79.20 | 0.83 | 0.90 | -2632.12 |
| <i>B. distachyon</i>   | 5lr8.1.A | 91.96 | 0.80 | 0.90 | -674.23  |
|                        | 4bqe.1.A | 79.42 | 0.92 | 0.89 | -2576.12 |
| <i>T. aestivum</i>     | 5lr8.1.A | 97.62 | 0.82 | 0.91 | -643.12  |
|                        | 4bqe.1.A | 80.24 | 0.92 | 0.90 | -2721.15 |
| <i>O. sativa</i>       | 5lr8.1.A | 86.10 | 0.79 | 0.89 | -674.12  |
|                        | 4bqe.1.A | 80.92 | 0.93 | 0.90 | -2671.32 |
| <i>A. thaliana</i>     | 5lr8.1.A | 76.43 | 0.77 | 0.88 | -587.12  |
|                        | 4bqe.1.A | 100   | 0.95 | 0.93 | -2442.31 |
| <i>S. lycopersicum</i> | 5lr8.1.A | 74.34 | 0.78 | 0.88 | -567.43  |
|                        | 4bqe.1.A | 81.33 | 0.90 | 0.90 | -2521.45 |
| <i>S. tuberosum</i>    | 5lr8.1.A | 74.70 | 0.78 | 0.87 | -589.32  |
|                        | 4bqe.1.A | 81.43 | 0.91 | 0.90 | -3489.52 |
| <i>C. annuum</i>       | 5lr8.1.A | 74.69 | 0.76 | 0.87 | -598.23  |
|                        | 4bqe.1.A | 80.36 | 0.91 | 0.90 | -2563.27 |

**Table S6.** Model quality assessment scores of 3D structures of PHO1 (upper row) and PHO2 (lower row) in 11 species.

| Species              | PROCHEK                 |                          |                                       |                             | G-fac-<br>tor | ERRAT                    | VERIFY3D                    | Status of<br>3D struc-<br>ture from<br>SAVES |
|----------------------|-------------------------|--------------------------|---------------------------------------|-----------------------------|---------------|--------------------------|-----------------------------|----------------------------------------------|
|                      | Favoured*<br>region (%) | Allowed<br>region<br>(%) | Generously<br>allowed re-<br>gion (%) | Disallowed<br>region<br>(%) |               | Quality<br>factor<br>(%) | (3D-1D Pro-<br>file)<br>(%) |                                              |
| <i>S. bicolor</i>    | 91.1                    | 7.7                      | 0.7                                   | 0.5                         | -0.11         | 95.19                    | 0.2                         | PASS                                         |
|                      | 91.5                    | 8.2                      | 0.3                                   | 0.0                         | -0.04         | 95.88                    | 0.2                         | PASS                                         |
| <i>Z. mays</i>       | 90.4                    | 8.3                      | 0.8                                   | 0.6                         | -0.12         | 96.34                    | 0.2                         | PASS                                         |
|                      | 91.5                    | 8.2                      | 0.3                                   | 0.0                         | 0.00          | 96.62                    | 0.2                         | PASS                                         |
| <i>S. italica</i>    | 90.1                    | 8.4                      | 1.0                                   | 0.6                         | -0.11         | 97.70                    | 0.2                         | PASS                                         |
|                      | 91.4                    | 8.2                      | 0.3                                   | 0.1                         | -0.03         | 96.19                    | 0.2                         | PASS                                         |
| <i>P. hallii</i>     | 90.4                    | 7.7                      | 1.1                                   | 0.7                         | -0.11         | 96.76                    | 0.2                         | PASS                                         |
|                      | 91.5                    | 8.2                      | 0.3                                   | 0.0                         | 0.00          | 96.62                    | 0.2                         | PASS                                         |
| <i>B. distachyon</i> | 89.5                    | 9.0                      | 0.7                                   | 0.7                         | -0.07         | 96.20                    | 0.2                         | PASS                                         |
|                      | 91.3                    | 8.4                      | 0.3                                   | 0.0                         | 0.01s         | 95.34                    | 0.2                         | PASS                                         |
| <i>T. aestivum</i>   | 91.0                    | 7.2                      | 1.1                                   | 0.6                         | -0.12         | 96.82                    | 0.2                         | PASS                                         |
|                      | 91.3                    | 84                       | 0.3                                   | 0.0                         | 0.00          | 96.80                    | 0.2                         | PASS                                         |

|                        |      |     |     |     |       |       |     |      |
|------------------------|------|-----|-----|-----|-------|-------|-----|------|
| <i>O. sativa</i>       | 90.8 | 7.8 | 0.9 | 0.5 | -0.10 | 95.87 | 0.2 | PASS |
|                        | 91.8 | 7.9 | 0.3 | 0.0 | -0.02 | 96.63 | 0.2 | PASS |
| <i>A. thaliana</i>     | 91.5 | 7.4 | 0.6 | 0.4 | -0.09 | 97.06 | 0.2 | PASS |
|                        | 91.3 | 8.4 | 0.3 | 0.0 | 0.01  | 97.61 | 0.2 | PASS |
| <i>S. lycopersicum</i> | 91.4 | 7.6 | 0.7 | 0.3 | -0.08 | 94.71 | 0.2 | PASS |
|                        | 91.8 | 7.9 | 0.2 | 0.0 | -0.04 | 96.63 | 0.2 | PASS |
| <i>S. tuberosum</i>    | 91.2 | 7.5 | 0.9 | 0.4 | -0.10 | 92.87 | 0.2 | PASS |
|                        | 91.8 | 7.9 | 0.3 | 0.0 | 0.00  | 95.77 | 0.2 | PASS |
| <i>C. annuum</i>       | 90.9 | 7.4 | 1.1 | 0.6 | -0.09 | 96.45 | 0.2 | PASS |
|                        | 92.2 | 7.6 | 0.2 | 0.0 | -0.04 | 96.26 | 0.2 | PASS |

\* Based on an analysis of 118 structures of resolution of at least 2.0 Å and R-factor no greater than 20%, a good quality model would be expected to have maximum number of amino acids in the most favoured regions.

**Table S7.** Predicted values of different parameters of superimposition of 3D protein structures of PHO1 and PHO2 of different plant species over 3D protein structure of *H. vulgare* PHO1 and *A. thaliana* PHO2 respectively.

| Species                | RMSD* |      | %Identity |       | %Similarity |       |
|------------------------|-------|------|-----------|-------|-------------|-------|
|                        | PHO1  | PHO2 | PHO1      | PHO2  | PHO1        | PHO2  |
| <i>S. bicolor</i>      | 5.68  | 0.04 | 92.82     | 97.94 | 94.34       | 98.91 |
| <i>Z. mays</i>         | 2.74  | 0.21 | 89.10     | 96.98 | 91.59       | 99.27 |
| <i>S. italica</i>      | 2.04  | 0.06 | 86.29     | 95.53 | 88.95       | 98.55 |
| <i>P. hallii</i>       | 2.42  | 1.63 | 86.65     | 56.56 | 91.68       | 70.45 |
| <i>B. distachyon</i>   | 3.12  | 0.05 | 84.46     | 92.82 | 89.89       | 97.15 |
| <i>T. aestivum</i>     | 3.62  | 0.07 | 83.14     | 90.55 | 88.83       | 95.88 |
| <i>O. sativa</i>       | 2.20  | 0.25 | 73.73     | 79.32 | 85.54       | 90.33 |
| <i>A. thaliana</i>     | 3.87  | 0.34 | 74.83     | 78.40 | 85.87       | 89.20 |
| <i>S. lycopersicum</i> | 2.10  | 0.26 | 74.70     | 78.67 | 86.41       | 89.21 |
| <i>S. tuberosum</i>    | 2.41  | 0.37 | 74.09     | 77.27 | 85.23       | 89.12 |
| <i>C. annuum</i>       | 5.68  | 0.04 | 92.82     | 97.94 | 94.34       | 98.91 |

\*Root Mean Square Deviation.



**Table S8.** Ligand Binding amino acid residues and their positions in PHO1 and PHO2.

| Species            | Amino acids and their position |     |     |     |     |     |     |     |     |     |     |     |     |     |     |     |
|--------------------|--------------------------------|-----|-----|-----|-----|-----|-----|-----|-----|-----|-----|-----|-----|-----|-----|-----|
|                    | PHO1                           |     |     |     |     |     |     |     |     |     |     |     |     |     |     |     |
| <i>S. bicolor</i>  | L                              | G   | G   | R   | W   | V   | K   | Y   | N   | V   | A   | G   | T   | S   | N   | K   |
|                    | 149                            | 193 | 194 | 197 | 637 | 714 | 715 | 799 | 800 | 801 | 804 | 826 | 827 | 828 | 829 | 831 |
| <i>Z. mays</i>     | L                              | G   | G   | R   | W   | V   | K   | Y   | N   | V   | A   | G   | T   | S   | N   | K   |
|                    | 149                            | 193 | 194 | 197 | 636 | 713 | 714 | 798 | 799 | 800 | 803 | 825 | 826 | 827 | 828 | 830 |
| <i>S. italica</i>  | L                              | G   | G   | R   | W   | V   | K   | Y   | N   | V   | A   | G   | T   | S   | N   | K   |
|                    | 145                            | 189 | 190 | 193 | 632 | 709 | 710 | 794 | 795 | 796 | 799 | 821 | 822 | 823 | 824 | 826 |
| <i>P. hallii</i>   | L                              | G   | G   | R   | W   | V   | K   | Y   | N   | V   | A   | G   | T   | S   | N   | K   |
|                    | 151                            | 195 | 196 | 199 | 639 | 716 | 717 | 801 | 802 | 803 | 806 | 828 | 829 | 830 | 831 | 833 |
| <i>T. aestivum</i> | L                              | G   | G   | R   | W   | V   | K   | Y   | N   | V   | A   | G   | T   | S   | N   | K   |
|                    | 140                            | 184 | 185 | 188 | 623 | 700 | 701 | 785 | 786 | 787 | 790 | 812 | 813 | 814 | 815 | 817 |
| <i>O. sativa</i>   | L                              | G   | G   | R   | W   | V   | K   | Y   | N   | V   | A   | G   | T   | S   | N   | K   |
|                    | 144                            | 188 | 189 | 192 | 630 | 707 | 708 | 792 | 793 | 794 | 797 | 819 | 820 | 821 | 822 | 824 |
| <i>A. thaliana</i> | L                              | G   | G   | R   | W   | K   | Y   | N   | V   | A   | G   | T   | S   | N   | K   |     |
|                    | 159                            | 203 | 204 | 207 | 614 | 692 | 776 | 777 | 778 | 781 | 803 | 804 | 805 | 806 | 808 |     |
| <i>H. vulgare</i>  | L                              | G   | G   | R   | W   | V   | K   | Y   | N   | V   | A   | G   | T   | S   | N   | K   |
|                    | 137                            | 181 | 182 | 185 | 620 | 697 | 698 | 782 | 783 | 784 | 787 | 809 | 810 | 811 | 812 | 814 |
| <i>C. annuum</i>   | PHO2                           |     |     |     |     |     |     |     |     |     |     |     |     |     |     |     |
|                    | L                              | G   | G   | R   | W   | K   | Y   | N   | V   | A   | G   | T   | S   | N   | K   | L   |
|                    | 99                             | 143 | 144 | 147 | 500 | 578 | 661 | 662 | 663 | 666 | 688 | 689 | 690 | 691 | 693 | 99  |

Note: Missing species are not identified to possess the ligand binding sites
